# Supplementary material
Source: publisher figshare collection journal article supplement (https://karger.figshare.com/articles/dataset/_/5121655)

**Figure S1**

Linear regressions for predicting mesiodistal length from age in female (black circles) and known age males (white circles) premolars and molars (P4: second premolar, M1: first molar, M2; second molar and M3; third molar).

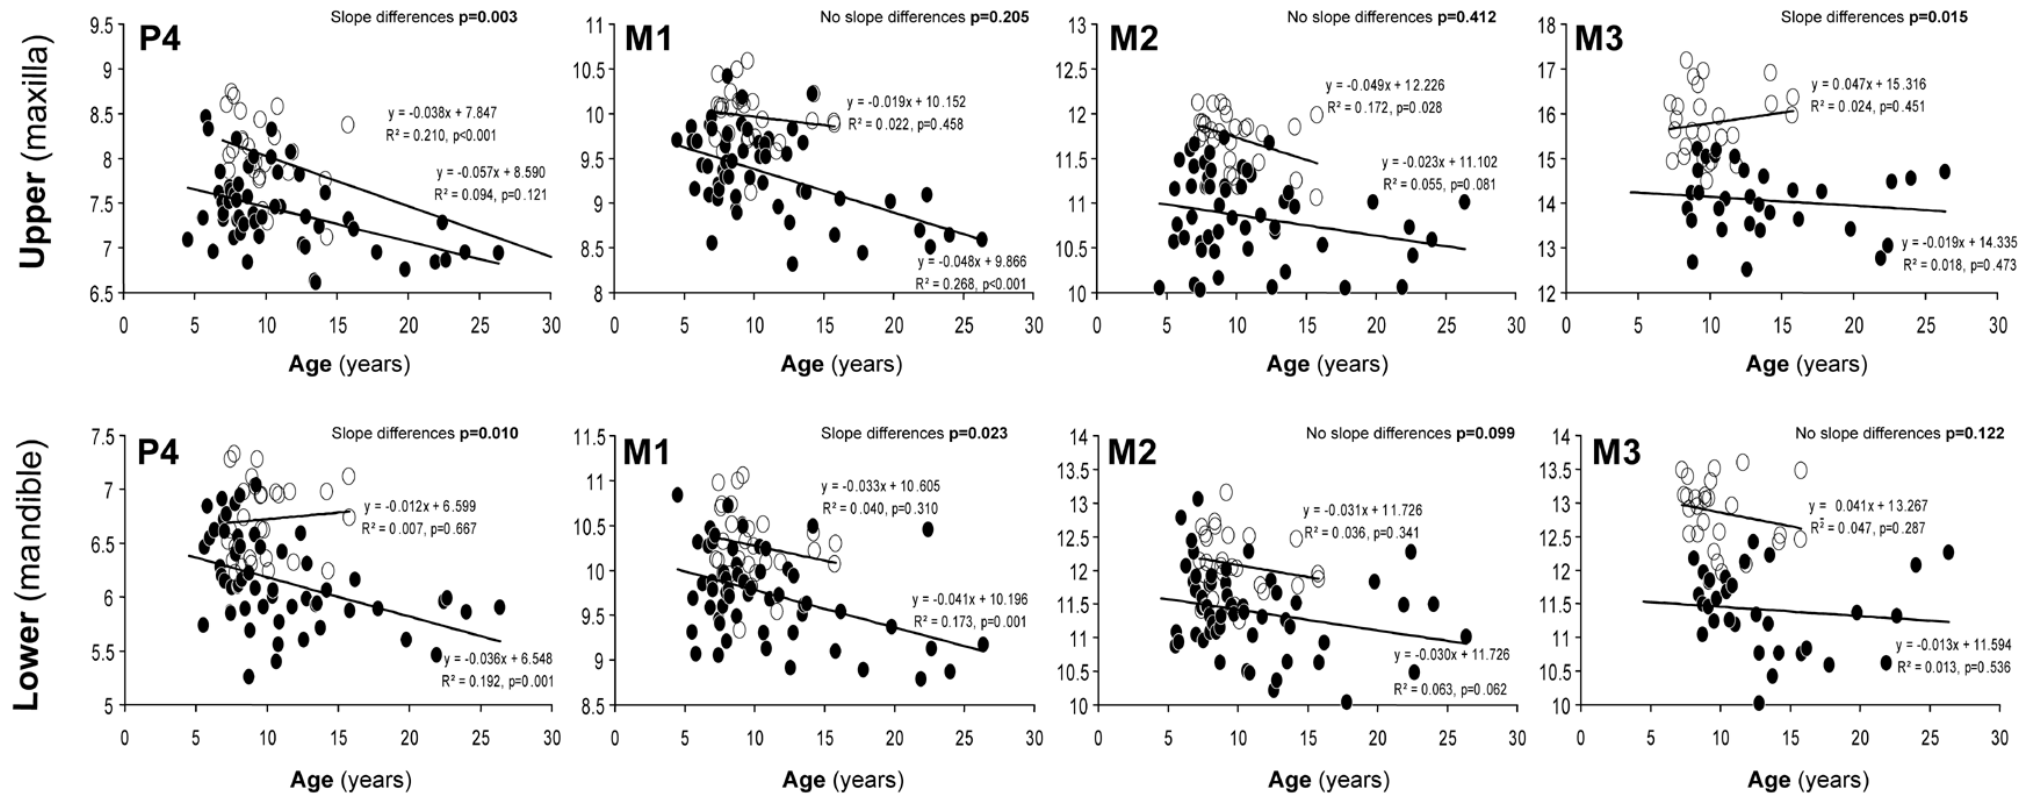

Supplement: Supplementary file 1 [file 1]
