# Supplementary material
Source: publisher figshare collection journal article supplement (https://karger.figshare.com/articles/dataset/_/5121655)
Supplement: Supplementary file 2 [file 1]

**Table S1**

Descriptive statistics of tooth crown mesiodistal length (n: sample size, min: minimum value, max: maximum value, mean and SD) in upper (U) and lower (L) premolars and molars (P4: second premolar, M1: first molar, M2: second molar and M3: third molar) in both sexes, including only individuals of known age.

|                | <b>Tooth</b> | <b>n</b> | <b>min</b> | <b>max</b> | <b>mean</b> | <b>SD</b> |
|----------------|--------------|----------|------------|------------|-------------|-----------|
| <b>Females</b> | UP4          | 56       | 5.26       | 7.04       | 6.15        | 0.42      |
|                | LP4          | 56       | 6.61       | 8.46       | 7.42        | 0.43      |
|                | UM1          | 57       | 8.79       | 10.84      | 9.74        | 0.51      |
|                | LM1          | 56       | 8.32       | 10.42      | 9.34        | 0.48      |
|                | UM2          | 56       | 10.04      | 13.06      | 11.39       | 0.62      |
|                | LM2          | 56       | 9.91       | 11.73      | 10.85       | 0.50      |
|                | UM3          | 32       | 10.02      | 12.42      | 11.41       | 0.60      |
|                | LM3          | 31       | 12.51      | 15.21      | 14.06       | 0.75      |
| <b>Males</b>   | UP4          | 29       | 6.22       | 7.33       | 6.72        | 0.36      |
|                | LP4          | 27       | 7.12       | 8,74       | 8.04        | 0.41      |
|                | UM1          | 28       | 9.33       | 11.06      | 10.28       | 0.41      |
|                | LM1          | 27       | 9.12       | 10.59      | 9.97        | 0.32      |
|                | UM2          | 27       | 11.25      | 13.15      | 12.09       | 0.47      |
|                | LM2          | 28       | 11.06      | 12.12      | 11.74       | 0.29      |
|                | UM3          | 26       | 11.97      | 13.60      | 12.86       | 0.48      |
|                | LM3          | 26       | 14.49      | 17.19      | 15.79       | 0.75      |

**Table S2**

Linear regressions for predicting mesiodistal length from age in upper (U) and lower (L) premolars and molars (P4: second premolar, M1: first molar, M2: second molar and M3: third molar) in both sexes, including only individuals of known age.

|                | <b>Tooth</b> | <b>n</b> | <b>R<sup>2</sup></b> | <b>F</b> | <b>P-value</b>   | <b>Equation</b>            | <b>Power</b> |
|----------------|--------------|----------|----------------------|----------|------------------|----------------------------|--------------|
| <b>Females</b> | UP4          | 56       | 0.192                | 12.842   | <b>0.001</b>     | Length = -0.036*age+6.548  | 0.96         |
|                | LP4          | 56       | 0.210                | 14.351   | <b>&lt;0.001</b> | Length = -0.038*age+7.847  | 0.97         |
|                | UM1          | 57       | 0.173                | 11.531   | <b>0.001</b>     | Length = -0.041*age+10.196 | 0.94         |
|                | LM1          | 56       | 0.268                | 19.814   | <b>&lt;0.001</b> | Length = -0.048*age+9.866  | 0.99         |
|                | UM2          | 56       | 0.063                | 3.638    | 0.062            | Length = -0.030*age+11.726 | 0.59         |
|                | LM2          | 56       | 0.055                | 3.172    | 0.081            | Length = -0.023*age+11.102 | 0.54         |
|                | UM3          | 32       | 0.013                | 0.391    | 0.536            | Length = -0.013*age+11.594 | 0.15         |
|                | LM3          | 31       | 0.018                | 0.528    | 0.473            | Length = -0.019*age+14.335 | 0.18         |
| <b>Males</b>   | UP4          | 29       | 0.007                | 0.189    | 0.667            | Length = -0.012*age+6.599  | 0.11         |
|                | LP4          | 27       | 0.094                | 2.581    | 0.121            | Length = -0.057*age+8.590  | 0.47         |
|                | UM1          | 28       | 0.040                | 1.071    | 0.310            | Length = -0.033*age+10.605 | 0.27         |
|                | LM1          | 27       | 0.022                | 0.569    | 0.458            | Length = -0.019*age+10.152 | 0.18         |
|                | UM2          | 27       | 0.036                | 0.943    | 0.341            | Length = -0.031*age+11.726 | 0.25         |
|                | LM2          | 28       | 0.172                | 5.383    | <b>0.028</b>     | Length = -0.049*age+12.226 | 0.73         |
|                | UM3          | 26       | 0.047                | 1.186    | 0.287            | Length = -0.041*age+13.267 | 0.28         |
|                | LM3          | 26       | 0.024                | 0.587    | 0.451            | Length = 0.047*age+15.316  | 0.19         |
